# Supplementary material for: Synthesis and X-ray Crystal Structure Analysis of Substituted 1,2,4-Triazolo [4’,3’:2,3]pyridazino[4,5-b]indole and Its Precursor
Source: MDPI journal article supplement (doi:10.3390/cryst13071036), 2023-06-29
Supplement: s1 [file s1]

## Supporting Materials

# Synthesis and X-ray Crystal Structure Analysis of Substituted 1,2,4-Triazolo [4',3':2,3]pyridazino[4,5-*b*]indole and Its Precursor

Ahmed T. A. Boraei <sup>1,\*</sup>, Elsayed H. Eltamany <sup>1</sup>, Matti Haukka <sup>2</sup>, Saied M. Soliman <sup>3</sup>, Assem Barakat <sup>4,\*</sup> and Manar Sopaih <sup>1</sup>

<sup>1</sup> Chemistry Department, Faculty of Science, Suez Canal University, Ismailia 41522, Egypt; elsayed\_mostafa@science.edu.eg or s.eltamany51@yahoo.com (E.H.E.); manar\_shalabi@science.edu.eg (M.S.)

<sup>2</sup> Department of Chemistry, University of Jyväskylä, P.O. Box 35, FI-40014 Jyväskylä, Finland; matti.o.haukka@jyu.fi

<sup>3</sup> Chemistry Department, Faculty of Science, Alexandria University, P.O. Box 426, Alexandria 21321, Egypt; saeed.soliman@alexu.edu.eg

<sup>4</sup> Department of Chemistry, College of Science, King Saud University, P.O. Box 2455, Riyadh 11451, Saudi Arabia

\* Correspondence: ahmed\_boraei@science.suez.edu.eg or ahmed\_tawfeek83@yahoo.com (A.T.A.B.); ambarakat@ksu.edu.sa (A.B.);  
Tel.: +966-11467-5901 (A.B.); Fax: +966-11467-5992 (A.B.)

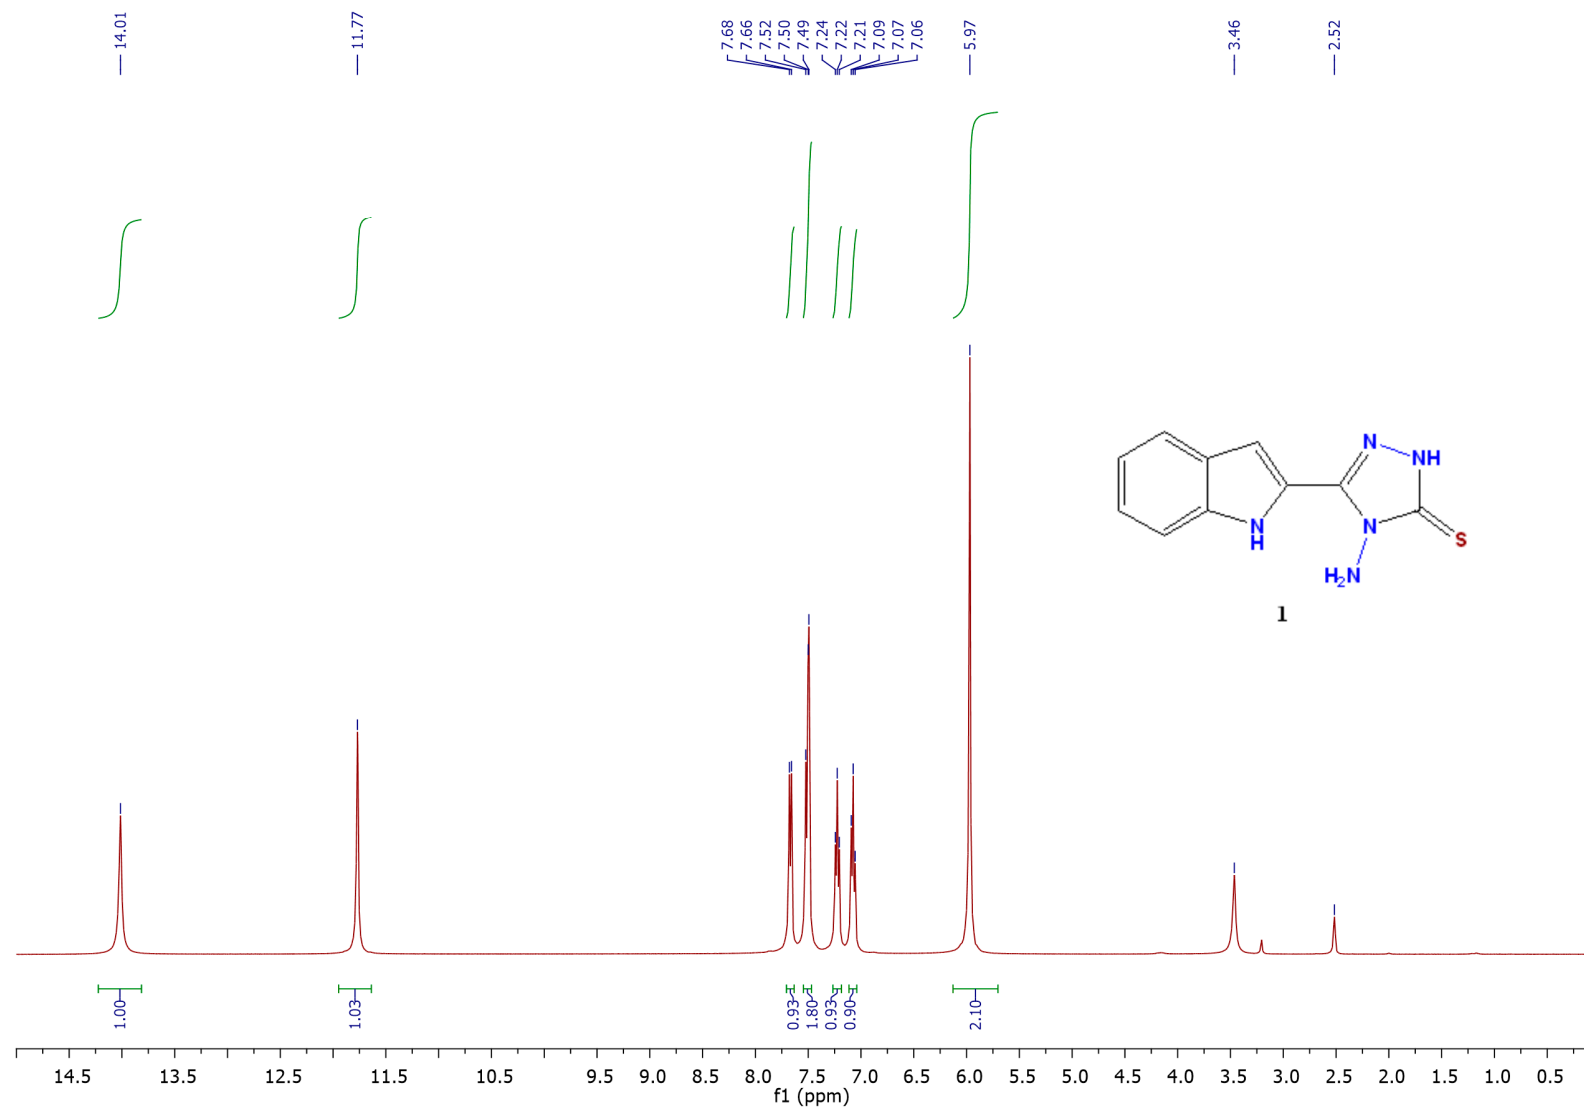

**Figure S1.** <sup>1</sup>H NMR of compound **1**.

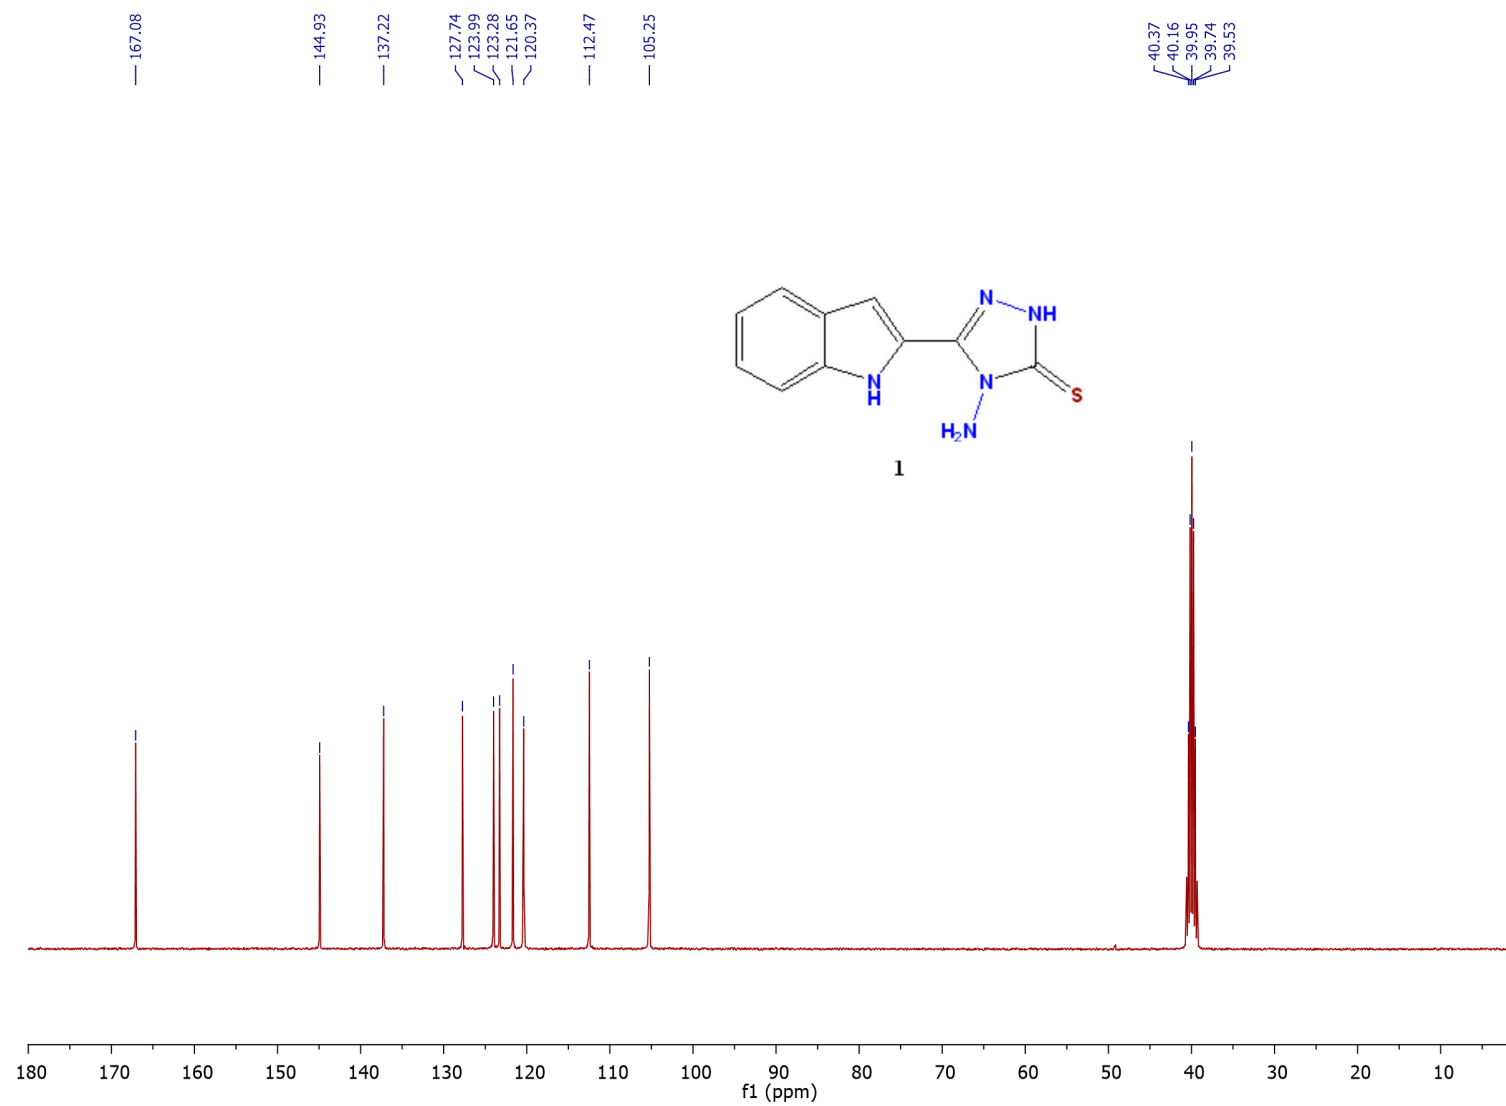

**Figure S2.** <sup>13</sup>CNMR of compound **1**.

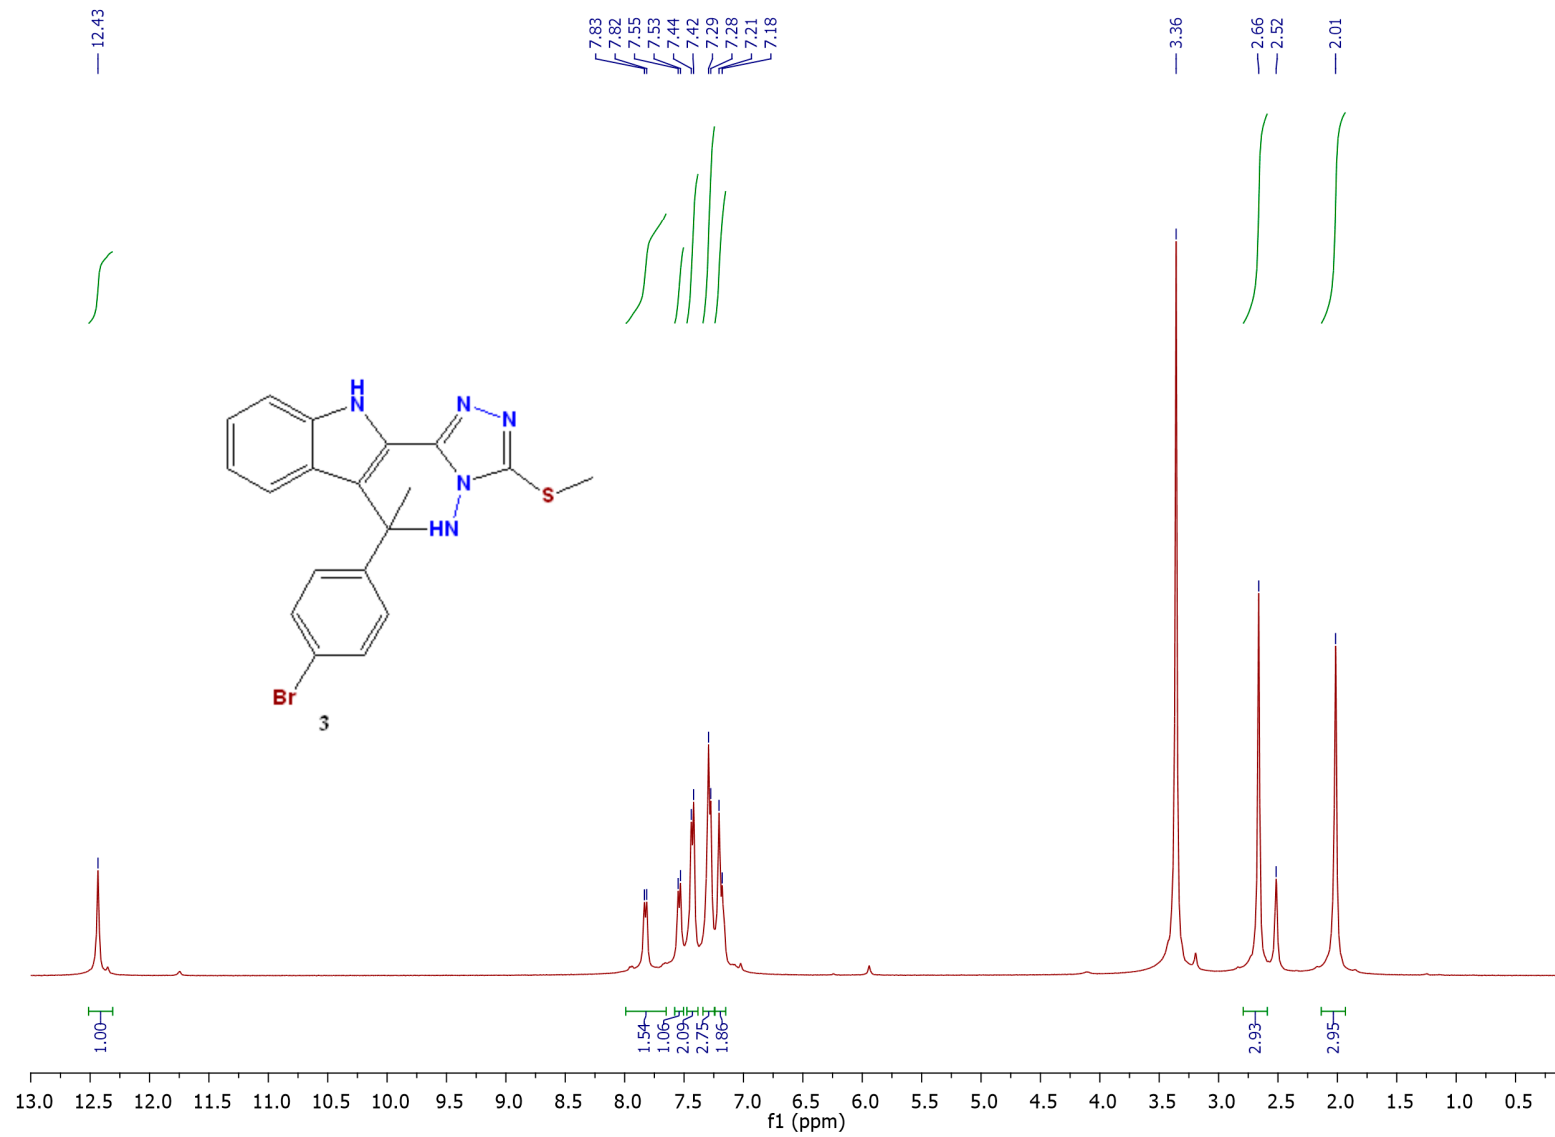

**Figure S3.**  $^1\text{H}$ NMR of compound **3**.

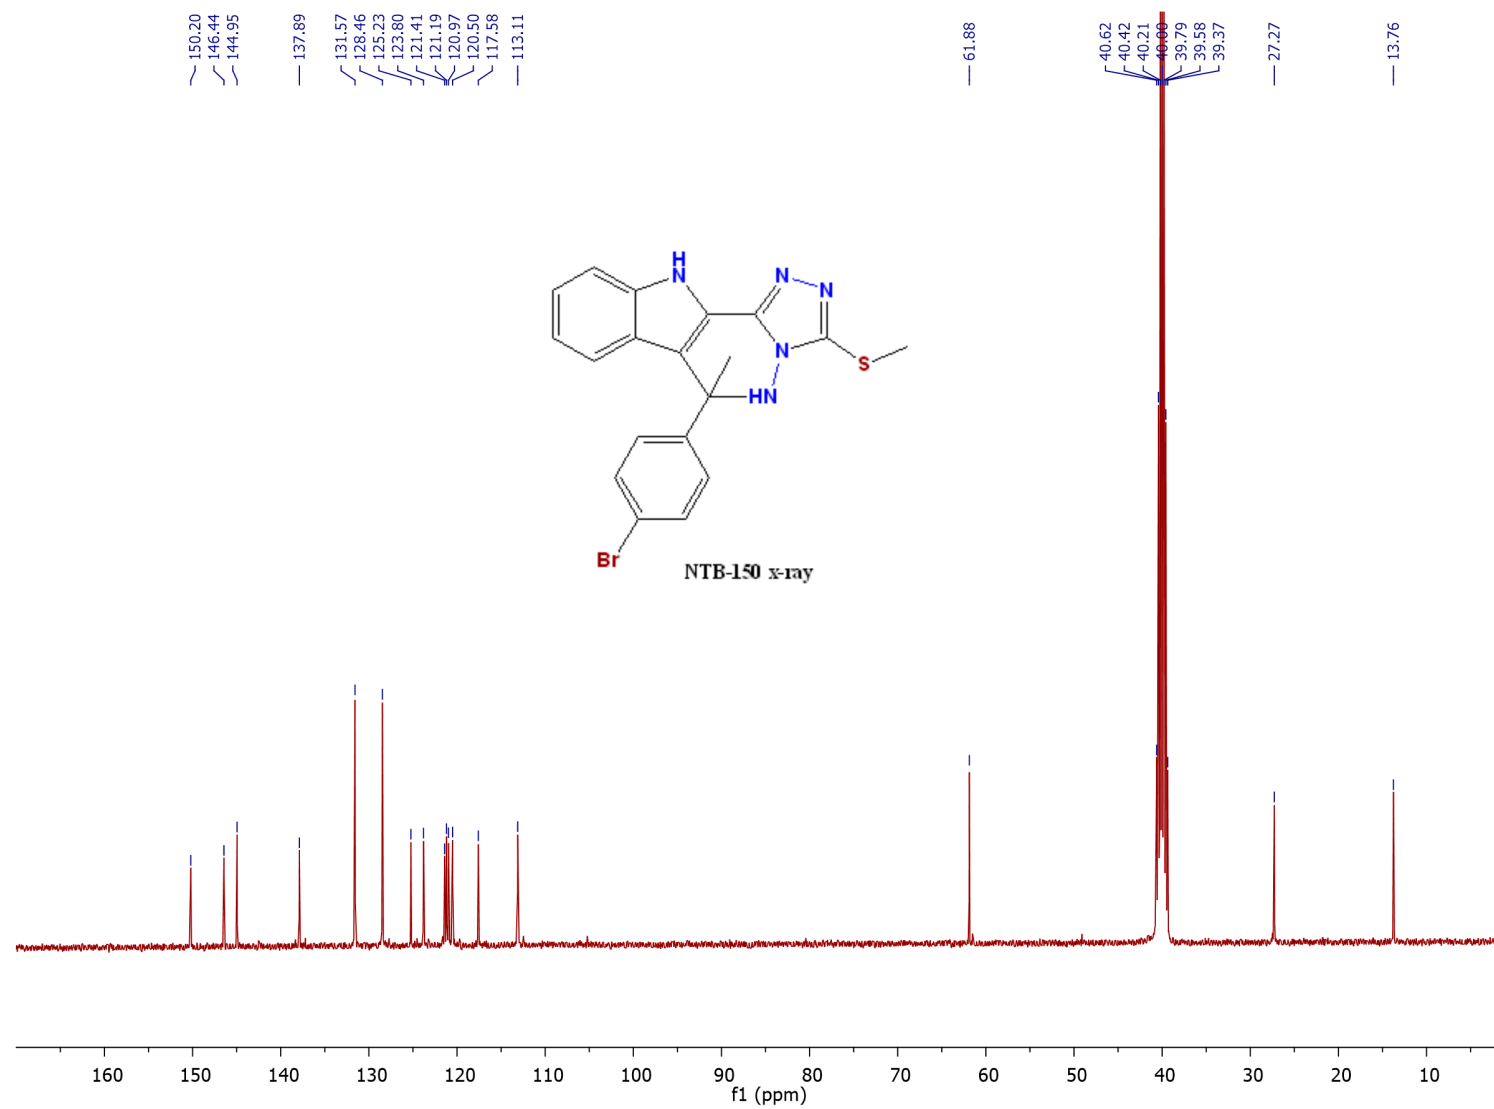

**Figure S4.**  $^{13}\text{C}$ NMR of compound 3.
